# Supplementary material
Source: Research Square preprint supplement (doi:10.21203/rs.3.rs-9016988/v1)
Supplement: Supplementary file 1 [file 3697be4857e02dec0516ab3a.docx]

Date…………………

**Introduction**

Good day. The Africa CDC and Partners are conducting a study to assess the current state of knowledge, attitudes and practices including social determinants of health considerations, regarding Mpox acquisition and preventive measures across member states of the African Union. The aim of our study is to provide basic information/data that could be useful in guiding risk communication, community engagement, outbreak preparedness, management and mitigation as well as vaccination uptake thus, controlling the outbreak, preventing spread and protecting the lives and livelihoods of the general population. Having discussed and gotten your consent, we would be grateful if you could kindly oblige us 45 minutes of your time to respond to some questions. All information supplied would be treated as strictly confidential. You can choose to not answer any question you feel uncomfortable to answer but your perspective across all the question is very important to us. Thank you! Can we proceed?

Yes No

**STUDY SITE DETAILS**

Country of study…………………………………………………

Capital city ………………………………………………………

Name of study site/Community:…………………………………

Geolocation of study site/community: LAT…………………… LONG………………..

**SECTION A: SOCIO-DEMOGRAPHIC DATA**

1. Age in years at last birthday: ____________________Date of birth dd/mm/yyyy:………….
2. Gender (do not ask, tick as appropriate): Male Female Others……………………..
3. Marital status (Tick whichever applies)

a) Married

b) Single (never married)

c) Divorced

d) Separated

e) If others, (Please specify) …………………….

1. What is your highest educational attainment?
2. No education
3. Informal/Qu’ranic
4. Primary
5. Secondary/high school
6. Tertiary
7. What is your Occupation?
8. Applicant
9. Farming
10. Trading/Business
11. Civil/public servant
12. Others

If others (Please specify)………………………………………………………….

1. What is your Religion?
2. Christianity
3. Islam
4. Traditional worshipper
5. Others

If others (Please specify)………………………………………………………….

1. What is your income level (tick the closest option?
2. Less than $1/day
3. 1-10$/Day
4. 11-20$/Day
5. 21-30$/Day
6. >30$/Day

8. Have you been diagnosed with any of these disease conditions within the past 1 month?

1. STIs
2. HIV
3. Tuberculosis
4. Malnutrition
5. Others

If others (Please specify)………………………………………………………….

**SECTION B: KNOWLEDGE RELATED TO MPOX**

1. Have you heard about Mpox? Yes No

**(If No, explain Mpox to the respondent, then probe to know if he/she is aware of it or have seen it, if yes, proceed with the next question but if still No, thank the respondents for being truthful, enlighten him/her and Mpox and move to the vaccine perception section)**

1. If yes, Is there a local name for Mpox in your community? A) Yes b) No C) Don’t Know
2. What causes the disease?
   1. Virus [ ]
   2. Bacteria [ ]
   3. Animal [ ]
   4. I don’t know [ ]
3. What species of animals are affected by Mpox?
   1. Rodents only [ ]
   2. Monkeys only [ ]
   3. Human only [ ]
   4. Rodents and human [ ]
   5. Monkeys and Human [ ]
   6. other animals (specify)……………
4. What are some of the symptoms of Mpox in humans that you know? (allow respondents to mention and then circle/tick as appropriate)
   1. Rash
   2. Fever
   3. Sore throat
   4. Headache
   5. Muscle aches
   6. Back pain
   7. Low energy
   8. Swollen lymph nodes.
   9. Others………………………………………………………………………………
5. Have you noticed any of these symptoms among people living in your area in the last three months? Yes No
6. If yes, List the symptoms (allow respondents to mention and then circle as appropriate)
7. Rash
8. Fever
9. Sore throat
10. Headache
11. Muscle aches
12. Back pain
13. Low energy
14. Swollen lymph nodes.
15. Others………………………………………………………………………………
16. How does Mpox spread/get transmitted (tick all the options mentioned by the respondents)
17. Touching an infected person (Skin to skin)
18. Kissing infected person (mouth to mouth/skin)
19. Breathing close to one another (face-to-face)
20. Indirect contact through contaminated objects/surfaces
21. Mother to child during pregnancy
22. Sexual transmission from an infected person to another
23. Animal to humans
24. If others, specify
25. Which people do you think are at risk for contracting Mpox (Tick all appropriately)
    1. Sex workers Yes No
    2. Travellers visiting affected areas Yes No
    3. People with intimate contacts to an infected person Yes No
    4. Hunters Yes No
    5. Persons who process or cook bush meat Yes No
    6. Healthcare worker caring for infected patients Yes No
    7. Household member of infected persons Yes No
    8. Children Yes No
    9. Aged people Yes No
    10. People living with HIV/AIDs Yes No
    11. People who have sex with multiple or new partners Yes No
    12. Long distance truck drivers Yes No
    13. Others, specify……………………………………………………………
26. Do you think you are at risk of contracting Mpox? Yes No
27. If yes, why are you at risk? ………………………………………………………………….
28. If no, why do you think you are not? ........................................................................................
29. How can Mpox be prevented/controlled? (Do not read out, tick all appropriate answers)
    1. Avoid close contact with anyone who has Mpox [ ]
    2. Clean your hands frequently with soap &water/an alcohol-based hand rub [ ]
    3. Testing and isolation of infected individual [ ]
    4. Avoid unprotected sex with infected individuals [ ]
    5. Avoid unprotected contact with wild animals [ ]
    6. Proper cooking of food containing animal parts or meat before eating [ ]
    7. Avoid processing and eating of bush meat [ ]
    8. Avoiding stigmatization [ ]
    9. Reporting any signs of Mpox to health officials for treatment [ ]
    10. If and when available, vaccination of at risk individuals [ ]
    11. Others (please specify):…………………………………………………………
30. If vaccination was not mentioned, ask: Is there an existing vaccine for Mpox?
    1. Yes
    2. No

22. If an Mpox vaccine was available to you in the coming month, how likely would you be to get the vaccine, that is to go for vaccination?

1. Very Likely / Definitely would get the vaccine [ ]
2. Somewhat likely [ ]
3. Somewhat unlikely [ ]
4. Very unlikely / Definitely would not get the vaccine [ ]
5. Don’t Know [ ]
6. If very unlikely, what are the reasons………………………………………………..

**SECTION C: PERCEPTION RELATED TO MPOX CONTROL AND PREVENTION**

I would like to know your perception towards Mpox. Try to answer the following questions as truthfully as possible

23. Mpox is a serious disease Agree Uncertain Disagree

24. Mpox can be prevented Agree Uncertain Disagree

25. Mpox in animals can cause disease in humans Agree Uncertain Disagree

26. Processing or eating bush meat can predispose to Mpox infection Agree Uncertain Disagree

27. Sex with an Mpox case can cause Mpox Agree Uncertain Disagree

28. Hand washing can reduce transmission of Mpox Agree Uncertain Disagree

29. Mpox is a curse from God and is healed by prayers Agree Uncertain Disagree

30. Vaccination against Mpox can prevent the disease Agree Uncertain Disagree

31.Washing/disinfecting surfaces reduces transmission Agree Uncertain Disagree

32. Mpox disease is Government propaganda, it’s not real Agree Uncertain Disagree

33. It is right to discriminate against Mpox cases Agree Uncertain Disagree

34. How concerned are you about contracting Mpox

1. Not concerned
2. Partially concerned
3. Concerned
4. Very concerned
5. On a scale of 10, how would you rate your risk of getting Mpox with 1 meaning no risk at all and 10 very much risk?

1 2 3 4 5 6 7 8 9 10

**No fear at all** **Very much fear**
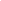


36. If a vaccine for Mpox were available to people in your community in the coming month free of charge, what portion of the people you know do you think would get the vaccine?

1. Most people would get the vaccine [ ]
2. About half of people would get the vaccine [ ]
3. Very few people would get the vaccine [ ]
4. Don’t Know [ ]
5. Won’t say [ ]

37. Do you think that most of your close family and friends would want you to get the Mpox vaccine if it was available to you in the coming month free of charge?

a. Yes [ ]

b. No [ ]

c. Don’t know [ ]

d. Won’t say [ ]

38. Do you think that most of your community leaders and religious leaders would want you to get an Mpox vaccine if it was available to you in the coming month free of charge?

1. Yes [ ]
2. No [ ]
3. Don’t Know [ ]
4. Won’t say [ ]

39. How much would you trust the Mpox vaccine if it were available to you in the coming month free of charge?

- 1. Not trust it at all [ ]
  2. Trust it a little [ ]
  3. Trust it a moderate amount [ ]
  4. Trust it a lot [ ]
  5. Don’t Know [ ]
  6. Won’t say [ ]

40. How safe do you think it would be for you to get the Mpox vaccine?

1. Not safe at all [ ]
2. Mostly safe [ ]
3. Very safe [ ]
4. Don’t Know [ ]
5. Won’t say [ ]

**SECTION D: PRACTICES RELATED TO MPOX PREVENTION AND CONTROL**

1. Since the recent outbreak of Mpox, have you modified your working habits or relationships for fear of Mpox?

Yes No

If Yes, (Specify) ________________________________________________

**For questions 41– 50, Tick responses as appropriate**

1. How often do you wash your hands before and after handling objects/touching surfaces?

Always Often Sometimes Rarely Never

1. When do you think handwashing is most critical?

Before eating After eating After using the toilet Before preparing food

1. What materials do you use in washing your hands after handling surfaces/objects?

Water only Water and soap Water, soap and disinfectant Water and ash

1. How long on the average do you wash your hand during each session?

10 secs 15 secs 20 secs 30 secs 1mins

1. How often do you consult a health professional when you feel ill?

Always Often Sometimes Rarely Never

1. What might be your first two actions, if you think you have Mpox (Tick any two)
2. Seek medical advice [ ]
3. Isolate yourself from others until you have been evaluated and tested [ ]
4. Go on with your normal life and wait until you see full symptoms [ ]
5. Take herbal/traditional medicines that work very fast [ ]
6. Visit the church/mosque for prayers [ ]
7. Others (Specify)___________________________________________
8. What actions will you take regarding intimacy if you suspected you have Mpox?
9. Disclose Mpox risk to partner [ ]
10. Take a break from having sex [ ]
11. Reduce number of new sexual partners and one-off sexual partners [ ]
12. Consistently using condoms [ ]
13. Others (Specify)……………………………………………………………….
14. What might you do if a child you are caring for has symptoms that could be Mpox
15. Seek immediate advice from a healthcare provider [ ]
16. Get them tested, to access the care they need [ ]
17. Take the child to the church/mosque for prayers [ ]
18. Others (please specify)_______________________________________
19. How easy is it for you to access vaccines and other primary healthcare services within walking distance from your home?
20. Very easy to access [ ]
21. Easy [ ]
22. Not easy [ ]

**E. INFORMATION SOURCES ON MPOX**

1. How did you get to know about Mpox (Do not read, tick as stated?
   1. Television [ ]
   2. Radio [ ]
   3. Newspaper [ ]
   4. Social media [ ]
   5. Official websites of health organizations [ ]
   6. Family and friends [ ]
   7. Employer [ ]
   8. Health provider/personnel [ ]
   9. Religious leaders [ ]
   10. Traditional leaders [ ]
   11. Political leaders [ ]
   12. others (specify)…………………………………..
2. Of these sources of information, which do you trust the most for accurate information on Mpox?
   1. Television [ ]
   2. Radio [ ]
   3. Newspaper [ ]
   4. Social media [ ]
   5. Africa CDC/WHO official website [ ]
   6. Family and friends [ ]
   7. Employer [ ]
   8. Health provider/personnel [ ]
   9. Religious leaders [ ]
   10. Traditional leaders [ ]
   11. Political leaders [ ]
   12. others (specify)…………………………………..
3. Do you feel you need more information about Mpox? Yes No

**Do you have any questions concerning Mpox.**

**………………………………………………………………………………………………………………………………………………………………………………………………………………………………………………………………………………………………**

**THANK YOU.**
