# Supplementary material
Source: Research Square preprint supplement (doi:10.21203/rs.3.rs-9016988/v1)
Supplement: Supplementary file 2 [file a5218f0e53b11d076aba3273.docx]

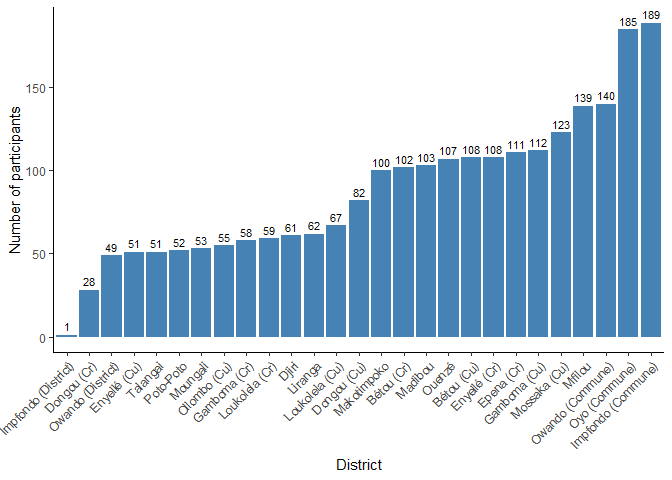


Figure 1 : Study participants per district


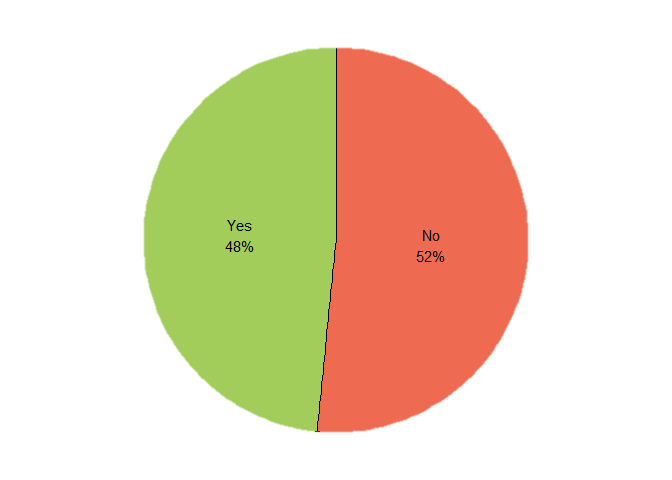


Figure 2 : Mpox Message exposure

Figure 3: Mpox Geographical Risk Categorization


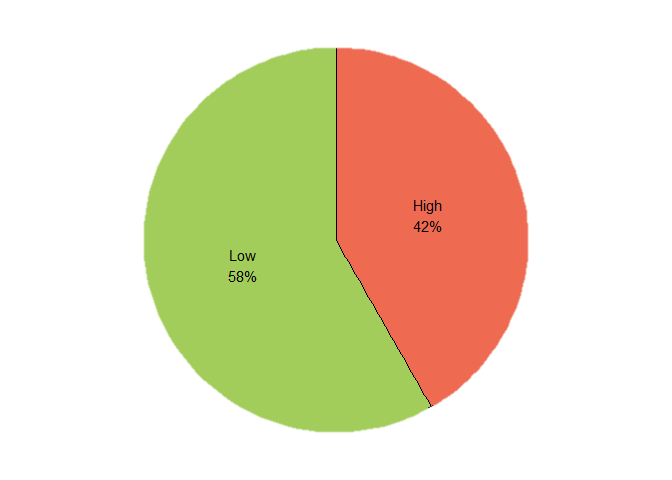

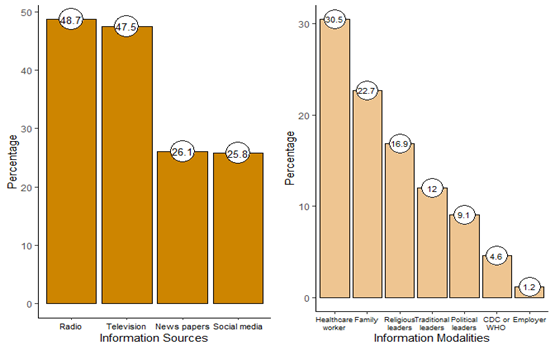


### Figure 4: Trust in Modalities and Sources of Information on Mpox


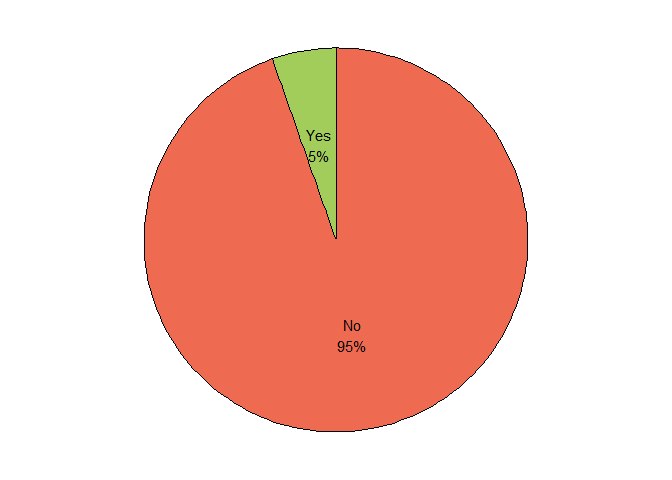


### Figure 5: Mpox comprehensive knowledge


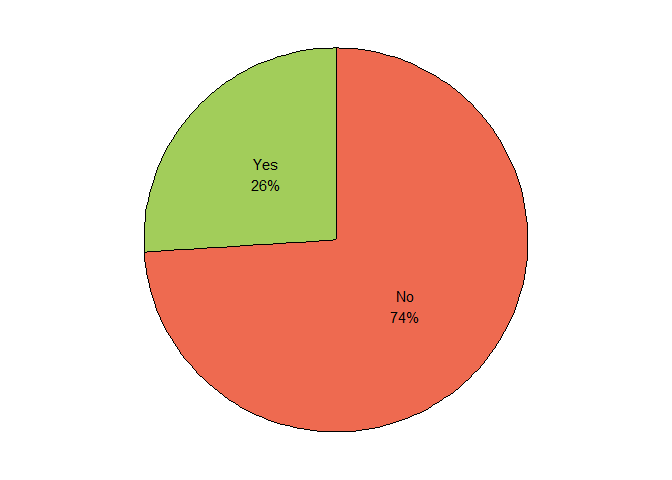


Figure 6: Mpox Prevention and Control practices


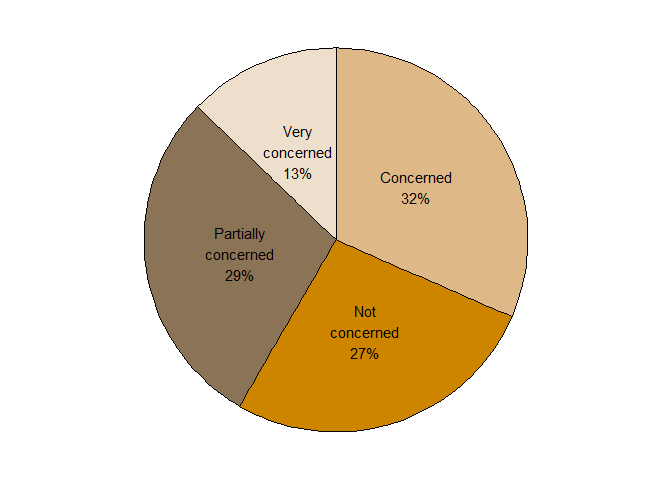


Figure 7: Study Participants’ Concerns About Contracting Mpox


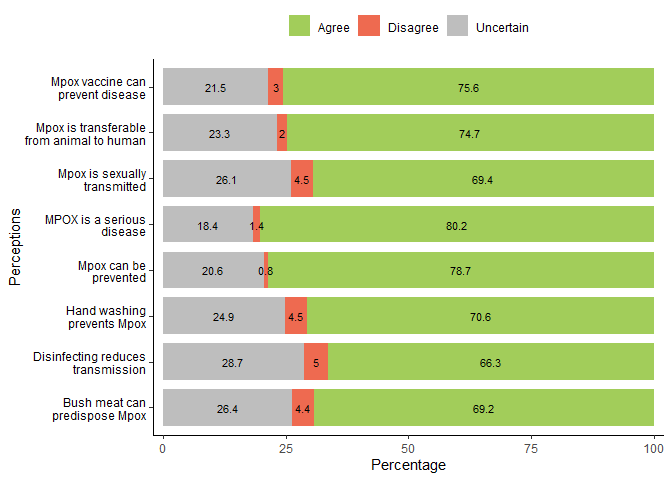


Figure 8: Study Participants’ Response to Knowledge Measures of Mpox


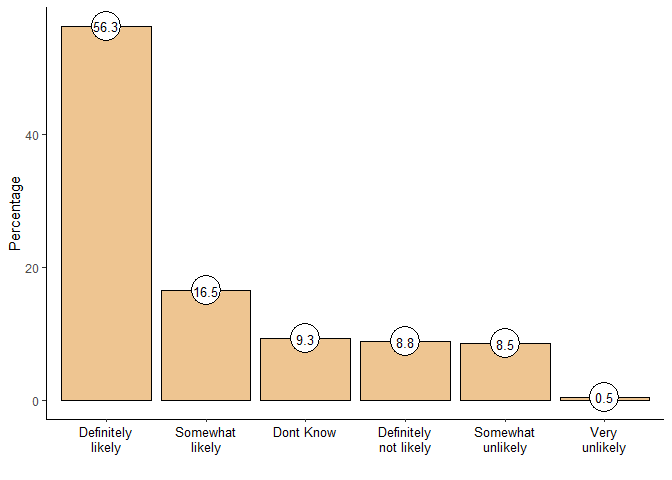


Figure 9: Study Participants’ Perception of Willingness to Accept Mpox Vaccine


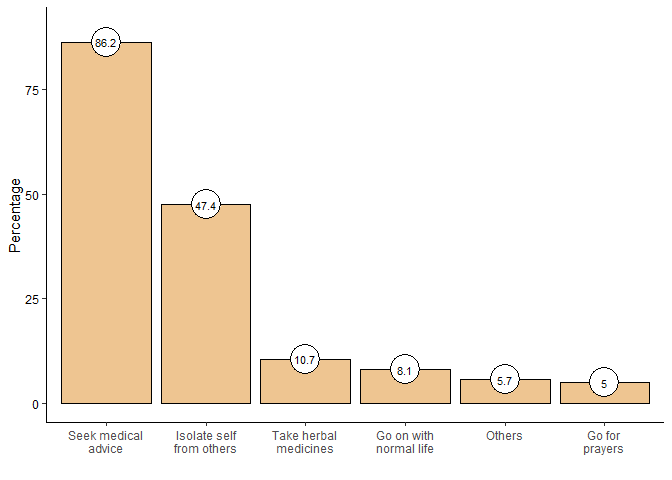


Figure 11: Study Participants’ Perceptions of Actions to Be Taken Following Symptoms of Mpox


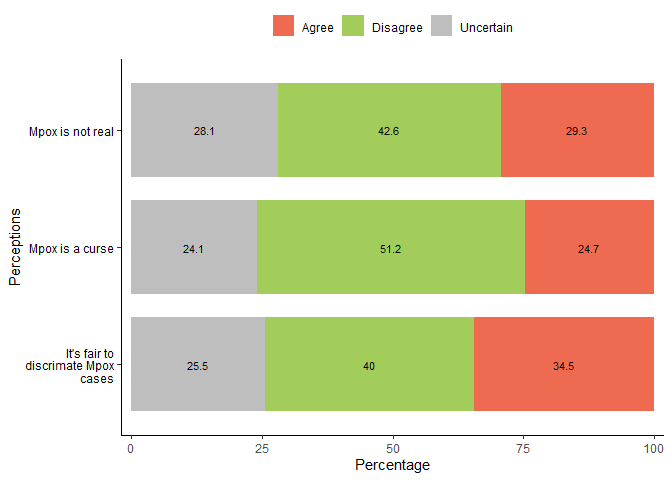


Figure 10: Study Participants’ Response to Misconception Measures of Mpox
